# Supplementary material
Source: MDPI journal article supplement (https://www.mdpi.com/2073-445X/11/7/963)
Supplement: s1 [file s1]

Archive with 4 entries (4 files):
- Supplementary Material SA.kmz
- Supplementary Material SB.pdf
- Supplementary Material SC.pdf
- Supplementary Material SD.pdf
